# Supplementary material
Source: MDPI journal article supplement (https://www.mdpi.com/2073-4395/13/1/125)
Supplement: s1 [file s1]

**Table S1. Average body sizes (from head to wing edge) of the adult insects tested**

| Group of test insects | Test insects                                   | Scientific name                                                        | Abbreviation | Body size (mm) <sup>a</sup> |
|-----------------------|------------------------------------------------|------------------------------------------------------------------------|--------------|-----------------------------|
| Small size            | Whiteflies                                     | <i>Bemisia tabaci</i> (Gennadius) (Hemiptera: Aleyrodidae)             | WH           | 0.82 ± 0.17                 |
|                       | Western flower thrips                          | <i>Frankliniella occidentalis</i> (Pergande) (Thysanoptera: Thripidae) | WFT          | 1.41 ± 0.44                 |
|                       | Tomato leaf miners (syn. vegetable leaf miner) | <i>Liriomyza sativae</i> Blanchard (Diptera: Agromyzidae)              | TLM          | 1.94 ± 0.56                 |
| Middle size           | Shore flies                                    | <i>Scatella stagnalis</i> (Fallén) (Diptera: Ephydriidae)              | SF           | 3.12 ± 0.27                 |
|                       | Vinegar flies                                  | <i>Drosophila melanogaster</i> Meigen (Diptera, Drosophilidae)         | VF           | 3.29 ± 0.43                 |
|                       | Winged green peach aphids                      | <i>Myzus persicae</i> (Sulzer) (Hemiptera: Aphididae)                  | GPA-w        | 3.65 ± 0.29                 |
| Large size            | Houseflies (male)                              | <i>Musca domestica</i> (Linnaeus) (Diptera: Muscidae)                  | HF-m         | 6.05 ± 0.73                 |
|                       | Greenbottle flies (male)                       | <i>Lucilia sericata</i> (Meigen) (Diptera: Calliphoridae)              | GBF-m        | 6.31 ± 0.31                 |
|                       | Houseflies (female)                            |                                                                        | HF-f         | 8.15 ± 0.68                 |
|                       | Greenbottle flies (female)                     |                                                                        | GBF-f        | 8.81 ± 0.41                 |

<sup>a</sup> Means and SD calculated from 20 adults of each species.
